# Supplementary material for: Human embryoid bodies as a 3D tissue model of the extracellular matrix and α-dystroglycanopathies
Source: PubMed Central journal article supplement (PMC7328151; doi:10.1242/dmm.042986), 2020-06-26
Supplement: dmm-13-042986-s1.pdf [file dmm-13-042986-s1.pdf]

## Supplementary information

### Supplementary figures

Figure S1

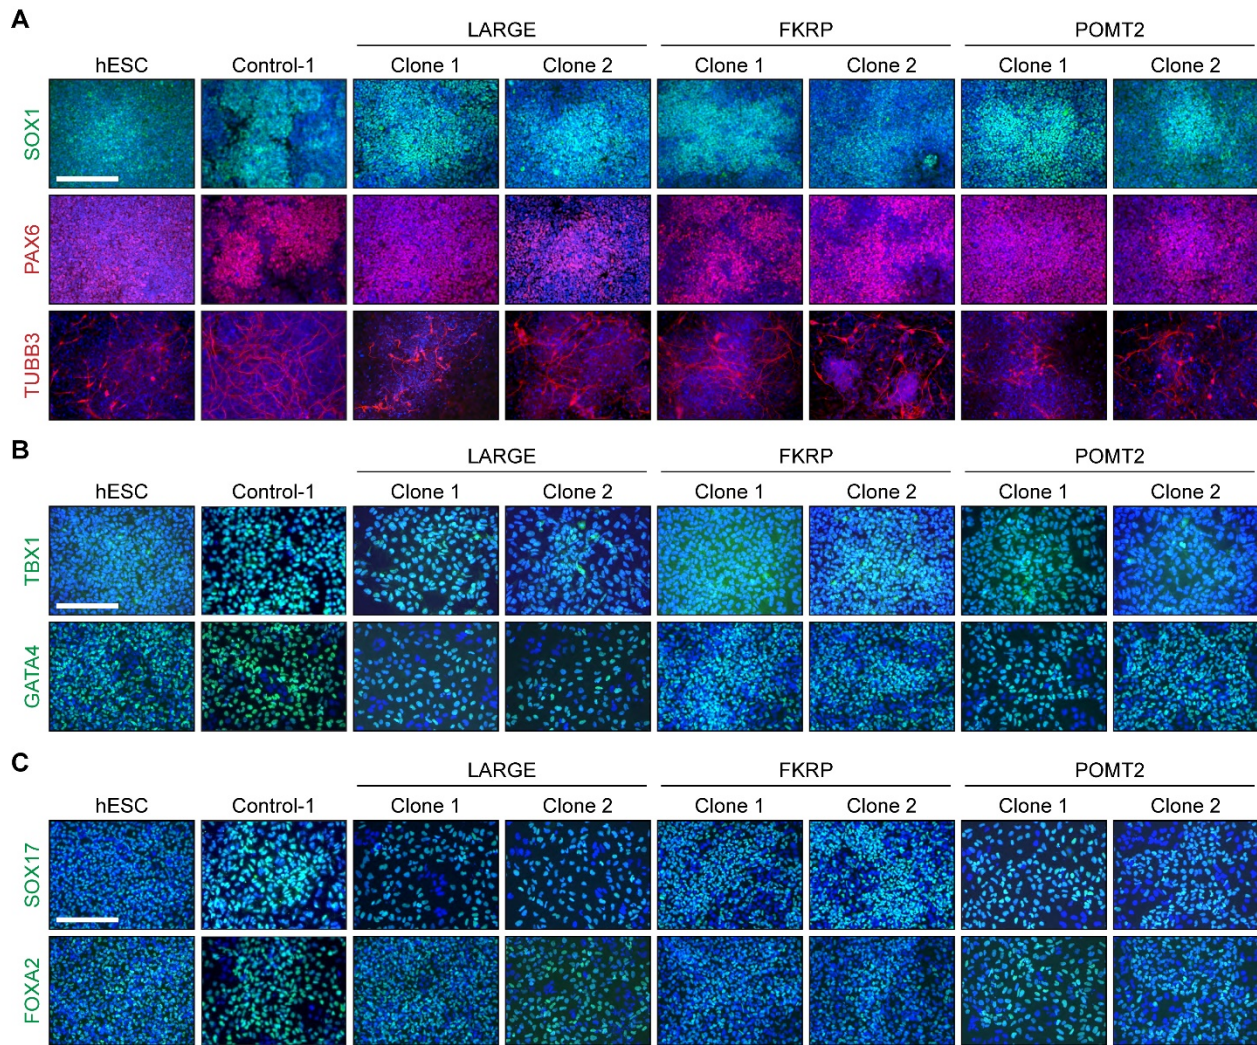

**Fig. S1. hiPSCs from  $\alpha$ -dystroglycanopathy patients show normal germ layer differentiation.** (A) Immunocytochemistry of ectoderm markers. hiPSCs were differentiated toward an ectoderm lineage via dual SMAD inhibition by treating the cultures with 1  $\mu$ M LDN-193189 and 10  $\mu$ M SB431542. Immunocytochemistry was performed after 6 days. (B, C) Immunocytochemistry of mesoderm and endoderm markers, respectively. Mesendoderm differentiation was mediated by treatment with 100 ng/mL Activin A and 75 ng/mL Wnt3a, and immunocytochemistry was performed after 3 days. hESC, H9 human embryonic stem cell line. Scale bars, 100  $\mu$ m.

**Figure S2**

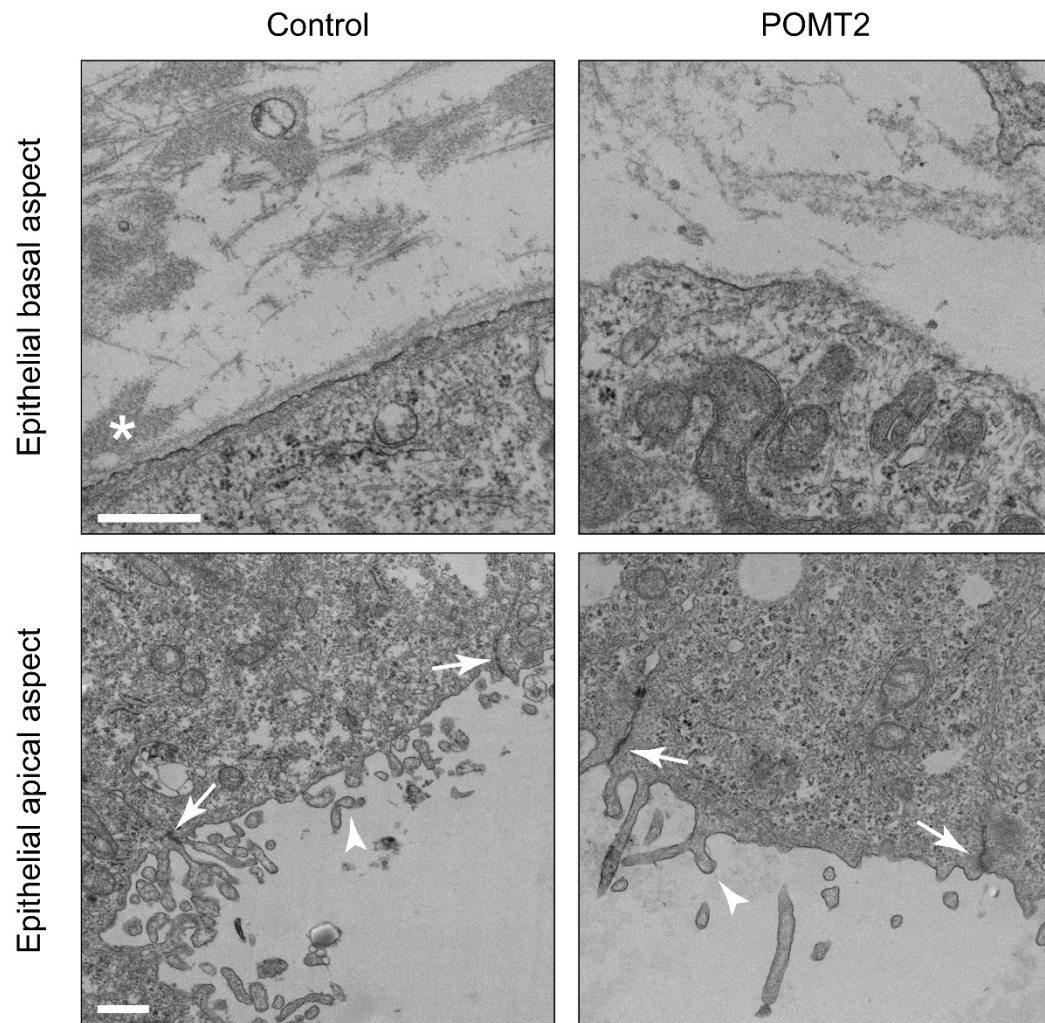

**Fig. S2. Ultrastructural examination of embryoid body morphology.** Transmission electron micrographs depicting the ultrastructural morphology of embryoid body epithelium. Rare attachment of fibrillar matrix to the basal lamina indicated by asterisk. Arrows demonstrate epithelial tight junctions, and the arrow head indicates apical microvilli. Scale bar, 500 nm.



## Figure S3

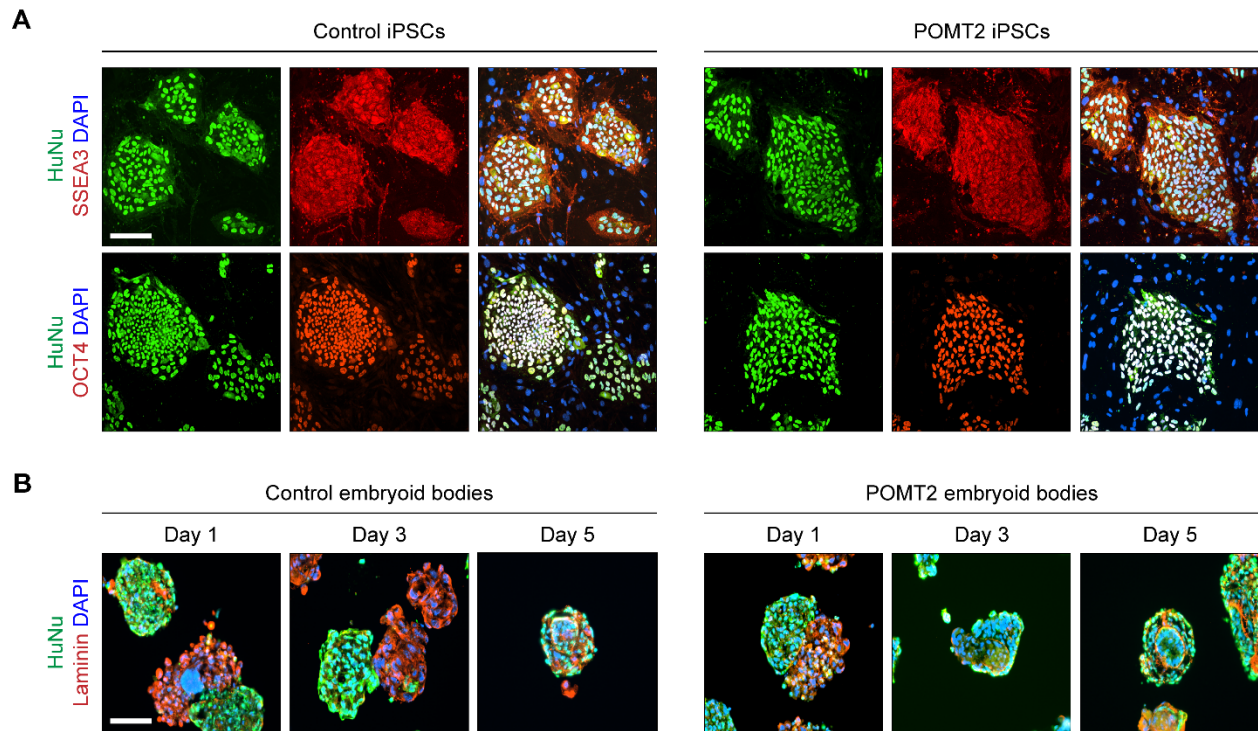

**Fig. S3. Morphologically mature embryoid bodies are virtually devoid of MEFs.** (A) Immunocytochemistry of feeder-dependent hiPSCs to distinguish human cells (HuNu) from MEFs. Control-1 hiPSCs and one hiPSC clone of the POMT2 patient were used. (B) Embryoid bodies at different time points, derived from control and POMT1 hiPSCs. Scale bars, 100  $\mu$ m.

## Figure S4

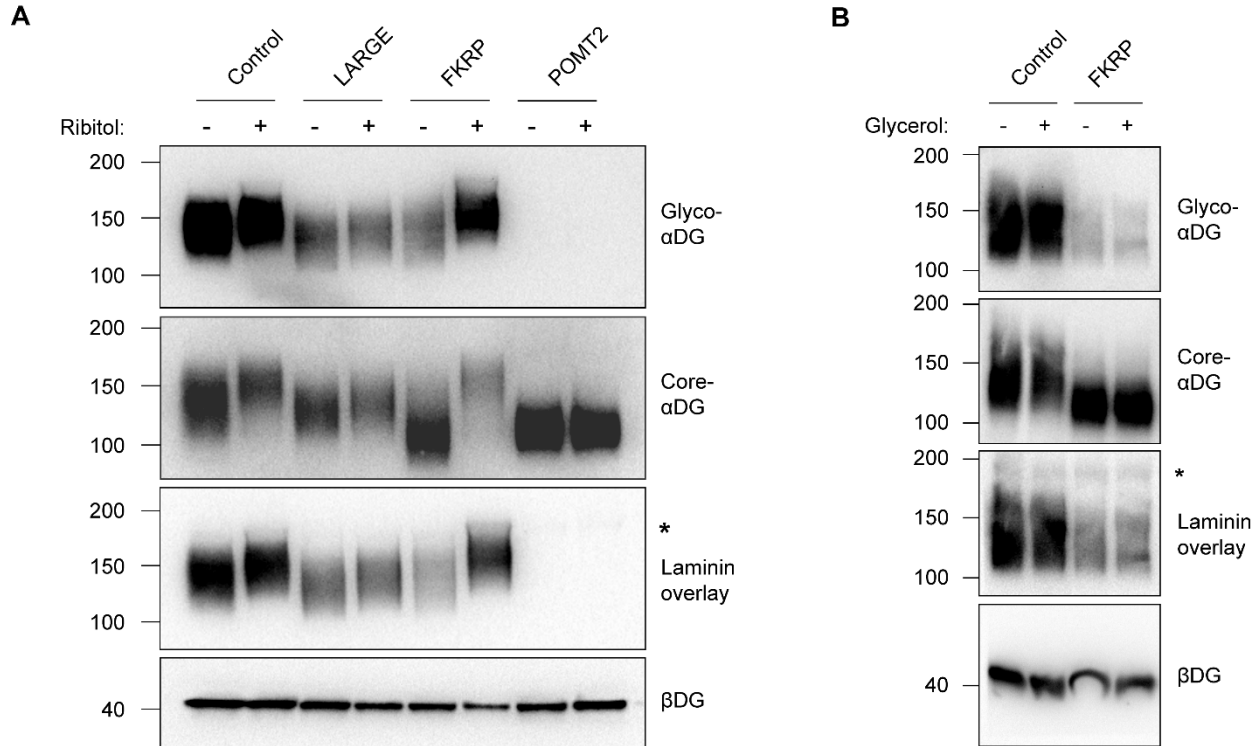

**Fig. S4. Ribitol treatment promotes functional glycosylation of αDG in FKRP hiPSCs.** (A) Western blotting of protein lysates from hiPSC cultures. hiPSCs were supplemented with daily medium changes with (+) or without (-) 3 mM ribitol for 72 hours before protein was collected. Asterisk indicates the position of endogenous laminin. (B) Daily administration of 3 mM glycerol for 72 hours shows no effect on αDG by western blot.

## Supplementary tables

**Table S1**  
**Characteristics of study subjects**

| Subject          | Age     | Gender | Clinical Presentation                                                                                                                                                                                               | Diagnosis                              | Genotype                                                               |
|------------------|---------|--------|---------------------------------------------------------------------------------------------------------------------------------------------------------------------------------------------------------------------|----------------------------------------|------------------------------------------------------------------------|
| <b>Control-1</b> | Neonate | Male   | N/A                                                                                                                                                                                                                 | N/A                                    | N/A                                                                    |
| <b>Control-2</b> | Neonate | Male   | N/A                                                                                                                                                                                                                 | N/A                                    | N/A                                                                    |
| <b>Control-3</b> | 51      | Female | N/A                                                                                                                                                                                                                 | N/A                                    | N/A                                                                    |
| <b>LARGE</b>     | 6       | Female | Delayed motor milestones, weakness and general hypotonia, able to walk stairs, mild autistic behavior, mild muscle biopsy, lissencephaly on brain MRI                                                               | Congenital muscular dystrophy type 1D  | LARGE1:<br>Heterozygous<br>- Exon 7 deletion<br>- Exons 3 – 7 deletion |
| <b>FKRP</b>      | 3       | Male   | Delayed motor milestones, mild weakness, trunk hypotonia, waddling gait, able to run, mild autistic behavior, moderate dystrophy on muscle biopsy, normal basement membrane on TEM                                  | Limb-girdle muscular dystrophy type 2I | FKRP:<br>Heterozygous<br>- C826A (p.L276I)<br>- G534T (p.W178C)        |
| <b>POMT2</b>     | 4 ½     | Female | Severely delayed motor milestones, hip dysplasia at birth, weakness and general hypotonia, unable to stand, joint contractures, failure to thrive, delayed speech acquisition, white matter hyperintensities on MRI | Muscle-Eye-Brain Disease               | POMT2:<br>Homozygous<br>- G1057A (p.G353S)                             |

Age in years; TEM, transmission electron microscopy; MRI, magnetic resonance imaging

**Table S2**

**Antibodies for immunofluorescence and western blots**

| <b>Antibody</b>                                | <b>Dilution</b>              | <b>Company</b>        | <b>Catalog Number</b> |
|------------------------------------------------|------------------------------|-----------------------|-----------------------|
| <b>SOX17</b>                                   | 1:100                        | Abcam                 | ab84990               |
| <b>OCT4</b>                                    | 1:200                        | Abcam                 | ab134218              |
| <b>Laminin</b>                                 | 1:1,000 (IF)<br>1:5,000 (WB) | Sigma-Aldrich         | L9393                 |
| <b>Glyco-<math>\alpha</math>DG</b><br>(IIH6C4) | 1:200 (IF)<br>1:1,000 (WB)   | Millipore             | 05-593                |
| <b>Core-<math>\alpha</math>DG</b>              | 1:500                        | R&D Systems           | AF6868                |
| <b><math>\beta</math>DG</b>                    | 1:10,000                     | GeneTex               | GTX124225             |
| <b>Nestin</b>                                  | 1:500                        | Millipore             | ABD69                 |
| <b>SSEA3</b>                                   | 1:200                        | Abcam                 | ab16286               |
| <b>SSEA4</b>                                   | 1:500                        | STEMCELL Technologies | 60062                 |
| <b>F-actin</b><br>(Phalloidin-647)             | 1:100                        | Thermo Fisher         | A22287                |
| <b>Perlecan</b>                                | 1:100                        | Millipore             | MAB1948-P             |
| <b>Nidogen</b>                                 | 1:50                         | R&D Systems           | MAB2570               |
| <b>COLIV</b>                                   | 1:1,000                      | Chemicon              | MAB1430               |
| <b>HuNu</b>                                    | 1:100                        | Millipore             | MAB1281               |

IF, immunofluorescence; WB, western blot
